# Supplementary material for: Polysaccharide-derived mesoporous materials (Starbon®) for sustainable separation of complex mixtures
Source: Royal Society of Chemistry journal article supplement (doi:10.1039/c7fd00056a), 2017-01-01
Supplement: c7fd00056a1.pdf [file c7fd00056a1.pdf]

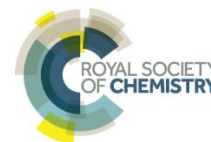

## Polysaccharide-derived mesoporous materials (Starbon<sup>®</sup>) for sustainable separation of complex mixtures

Received 00th January 20xx,  
Accepted 00th January 20xx

DOI: 10.1039/x0xx00000x

[www.rsc.org/](http://www.rsc.org/)

Vânia G. Zuin,<sup>a,b\*</sup> Vitaliy L. Budarin,<sup>b\*</sup> Mario De bruyn,<sup>b</sup> Peter S. Shuttleworth,<sup>c</sup> Andrew J. Hunt,<sup>b</sup> Camille Pluciennik,<sup>b</sup> Aleksandra Borisova,<sup>b</sup> Jennifer Dodson,<sup>b</sup> Helen L. Parker,<sup>b</sup> and James H. Clark<sup>b</sup>

<sup>a</sup> Department of Chemistry, Federal University of Sao Carlos, Rod. Washington Luís, km 235, Sao Carlos, SP, Sao Paulo, Brazil, 13.565-905, [vaniaz@ufscar.br](mailto:vaniaz@ufscar.br)

<sup>b</sup> Green Chemistry Centre of Excellence, Department of Chemistry, University of York, Heslington, York, YO10 5DD, UK

<sup>c</sup> Department of Physics, Elastomers & Energy Applications, CSIC c/Juan de la Cierva, 3, Madrid, 28006, Spain

### Supplementary material

#### Preparation of polysaccharide-derived mesoporous materials (A800) treated with by-products of a microwave assisted hydrothermal process of orange peel

One gram of A800 was added to a 10 mL solution prepared in acetone containing 0.05 g of resulting mixture of saccharides of rhamnose, galactose, glucose, GalA obtained from the low temperature hydrothermal microwave process of orange peel<sup>1,2</sup>, and stirred overnight at room temperature. After washing with acetone, the treated A800 carbonaceous material was dried at 40 °C overnight. Afterwards, 0.5 g of this material was subsequently carbonised at 300 °C at a heating rate of 1 °C min<sup>-1</sup> under an inert atmosphere. Both materials, dried at 40 °C (i.e. before pyrolysis) and the material subsequently pyrolysed at 300 °C, were used to prepare SPE cartridges, which were used to perform the extraction tests of the 10 selected bioactive phenolic compounds. The recovery results found for the all sorbents studied can be seen in Table 1.

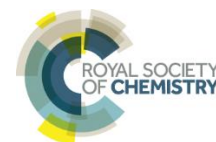

## Faraday Discussions

### PAPER

**Table 1.** Recovery (Mean and Relative Standard Deviation) of the selected phenolic compounds by SPE using C18, PGC and sustainable mesoporous carbonaceous materials as sorbents (S, A and PcB Starbon® series, including the novel treated A800 solid phases).

| Sorbent                 | 1.<br>Umbelliferone | 2.<br>Daidzein | 3.<br>Naringenin | 4.<br>Catechin | 5.<br>Quercetin | 6.<br>Diadzin | 7.<br>Hesperidin | 8.<br>Naringin | 9.<br>Rutin | 10.<br>Isoquercitrin |
|-------------------------|---------------------|----------------|------------------|----------------|-----------------|---------------|------------------|----------------|-------------|----------------------|
| PcB0                    | *                   | 89.6 (3.5)     | 89.4 (2.8)       | 107.4 (4.9)    | 118.4 (4.0)     | 105.1 (5.3)   | 80.4 (10.5)      | 104.8 (6.3)    | 89.7 (2.7)  | 104.1 (0.6)          |
| PcB300                  | 34.3 (1.7)          | 85.1 (5.0)     | 60.8 (3.0)       | 0.0 (0.0)      | 0.0 (0.0)       | 42.7 (4.9)    | 52.5 (4.2)       | 97.7 (4.1)     | 3.1 (8.8)   | 0.0 (0.0)            |
| S300                    | 87.8 (0.7)          | 79.1 (2.7)     | 84.4 (3.7)       | 40.6 (0.3)     | 74.7 (7.4)      | 86.6 (7.8)    | 90.7 (4.2)       | 88.9 (3.6)     | 90.5 (3.4)  | 82.1 (3.2)           |
| A300                    | 96.0 (4.8)          | 81.1 (1.4)     | 87.8 (2.0)       | 65.8 (2.1)     | 10.6 (7.8)      | 86.7 (2.6)    | 95.3 (2.8)       | 80.2 (1.0)     | 87.9 (4.1)  | 84.5 (3.4)           |
| PcB450                  | 56.8 (7.5)          | 98.5 (4.3)     | 66.1 (14.0)      | 0.0 (0.0)      | 0.0 (0.0)       | 50.5 (13.9)   | 56.8 (13.9)      | 88.6 (10.8)    | 0.0 (0.0)   | 0.0 (0.0)            |
| S450                    | 9.6 (11.9)          | 55.0 (5.4)     | 60.5 (11.2)      | 0.0 (0.0)      | 0.0 (0.0)       | 64.1 (8.0)    | 70.5 (2.3)       | 75.7 (3.9)     | 54.7 (4.6)  | 62.3 (2.7)           |
| A450                    | 58.1 (7.1)          | 68.6 (7.8)     | 53.0 (7.6)       | 0.0 (0.0)      | 0.0 (0.0)       | 38.6 (10.6)   | 41.9 (4.9)       | 66.9 (7.4)     | 6.6 (5.9)   | 0.0 (0.0)            |
| PcB600                  | 8.5 (5.7)           | 73.0 (2.7)     | 51.6 (1.4)       | 0.0 (0.0)      | 0.0 (0.0)       | 27.6 (13.5)   | 61.9 (2.2)       | 68.4 (9.6)     | 0.0 (0.0)   | 0.0 (0.0)            |
| S600                    | 31.2 (12.3)         | 0.0 (0.0)      | 0.0 (0.0)        | 0.0 (0.0)      | 0.0 (0.0)       | 15.7 (13.2)   | 88.7 (1.4)       | 0.0 (0.0)      | 0.0 (0.0)   | 0.0 (0.0)            |
| A600                    | 0.0 (0.0)           | 0.0 (0.0)      | 0.0 (0.0)        | 0.0 (0.0)      | 0.0 (0.0)       | 0.0 (0.0)     | 4.0 (16.3)       | 0.0 (0.0)      | 0.0 (0.0)   | 0.0 (0.0)            |
| PcB800                  | 0.0 (0.0)           | 0.0 (0.0)      | 0.0 (0.0)        | 0.0 (0.0)      | 0.0 (0.0)       | 0.0 (0.0)     | 0.0 (0.0)        | 0.0 (0.0)      | 0.0 (0.0)   | 0.0 (0.0)            |
| S800                    | 0.0 (0.0)           | 0.0 (0.0)      | 0.0 (0.0)        | 0.0 (0.0)      | 0.0 (0.0)       | 0.0 (0.0)     | 0.0 (0.0)        | 0.0 (0.0)      | 0.0 (0.0)   | 0.0 (0.0)            |
| A800                    | 0.0 (0.0)           | 0.0 (0.0)      | 0.0 (0.0)        | 0.0 (0.0)      | 0.0 (0.0)       | 0.0 (0.0)     | 0.0 (0.0)        | 0.0 (0.0)      | 0.0 (0.0)   | 0.0 (0.0)            |
| C18                     | 98.4 (1.2)          | 97.5 (1.1)     | 96.9 (1.9)       | 92.9 (4.8)     | 76.3 (7.8)      | 103.7 (5.8)   | 101.7 (1.3)      | 100.3 (4.7)    | 101.8 (2.4) | 100.1 (4.2)          |
| PGC                     | 0.0 (0.0)           | 0.0 (0.0)      | 0.0 (0.0)        | 0.7 (7.9)      | 0.0 (0.0)       | 0.0 (0.0)     | 0.0 (0.0)        | 1.1 (13.0)     | 0.0 (0.0)   | 0.0 (0.0)            |
| Treated A800            | 35.6 (9.2)          | 15.8(7.3)      | 53.1 (5.6)       | 0.0 (0.0)      | 0.0 (0.0)       | 40.6 (7.6)    | 88.6 (5.0)       | 10 (7.6)       | 0.0 (0.0)   | 0.0 (0.0)            |
| Treated and heated A800 | 0.0 (0.0)           | 0.0 (0.0)      | 25.6 (10.1)      | 0.0 (0.0)      | 0.0 (0.0)       | 0.0 (0.0)     | 74.3 (3.4)       | 0.0 (0.0)      | 0.0 (0.0)   | 0.0 (0.0)            |

\* Interference from PcB0 (method based on the addition of *t*-butanol to hydrogels before the freeze drying step).<sup>3</sup>

C18 and PGC SPE cartridges (0.1 g; 1mL) were obtained from Dionex Corporation (Sunnyvale, CA, USA) and Thermo Fisher Scientific Inc. (Waltham, MA USA).  
(n = 3)

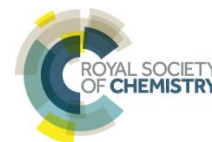

## Faraday Discussions

PAPER

### References

1. M. Balu, V. Budarin, P. S. Shuttleworth, L. A. Pfaltzgraff, K. Waldron, R. Luque and J. H. Clark, *ChemSusChem*, 2012, **5**, 1694-1697.
2. M. Kratchanova, E. Pavlova and I. Panchev, *Carbohydr Polym.*, 2004, **56**, 181-185.
3. A. Borisova, M. de Bruyn, V. L. Budarin, P. S. Shuttleworth, J. R. Dodson, M. L. Segatto and J. H. Clark, *Macromol. Rapid Commun.*, 2015, **36**, 774-779.
